# Supplementary material for: Gene regulatory response to hyposalinity in the brown seaweed Fucus vesiculosus
Source: BMC Genomics. 2020 Jan 13;21:42. doi: 10.1186/s12864-020-6470-y (PMC6958763; doi:10.1186/s12864-020-6470-y)
Supplement: Supplementary file 2 — Additional file 2. list of genes differentially expressed due to hyposalinity for Rauma population (FDR < 0.05 and |log2FC| > 1). [file 12864_2020_6470_MOESM2_ESM.xls]

## Sheet: LR_Additional file 2
	log2FoldChange	function	GO		shared by both pop
TRINITY_DN203860_c0_g1	Down	regulation of transcription from RNA polymerase	GO:0006357		yes
TRINITY_DN216523_c0_g2	Down	NA			yes
TRINITY_DN216193_c2_g7	Down	Esi_0107_0067
TRINITY_DN172677_c0_g1	Down	NA			yes
TRINITY_DN206827_c3_g2	Down	Esi_0107_0067			yes
TRINITY_DN213393_c1_g4	Down	Predicted protein			yes
TRINITY_DN203244_c0_g1	Down	glucose dehydrogenase			yes
TRINITY_DN204349_c0_g1	Down	Esi_0076_0043
TRINITY_DN216964_c1_g8	Down	glucose sorbosone dehydrogenase			yes
TRINITY_DN219649_c0_g4	Down	Proteolysis	GO:0006508		yes
TRINITY_DN217760_c0_g3	Down	conserved unknown protein			yes
TRINITY_DN207689_c0_g1	Down	NA			yes
TRINITY_DN205115_c1_g1	Down	glucose sorbosone dehydrogenase	GO:0003824
TRINITY_DN216065_c1_g4	Down	Mannuronan C-5-epimerase	GO:0016021		yes
TRINITY_DN208573_c0_g1	Down	NA			yes
TRINITY_DN219702_c5_g2	Down	Mannuronan C-5-epimerase	GO:0016020		yes
TRINITY_DN214005_c1_g13	Down	NA			yes
TRINITY_DN207105_c1_g1	Down	NA			yes
TRINITY_DN203926_c0_g4	Down	Mannuronan C-5-epimerase	GO:0016853		yes
TRINITY_DN217554_c0_g1	Down	Pleckstrin homology domain			yes
TRINITY_DN219747_c5_g10	Up	putative membrane protein			yes
TRINITY_DN210779_c8_g1	Up	NA
TRINITY_DN208482_c0_g2	Up	FirrV-1-B30 precursor
TRINITY_DN204300_c4_g1	Up	fucoxanthin chlorophyll	GO:0009765		yes
TRINITY_DN172333_c0_g1	Up	thiosulfate sulfurtransferase activity	GO:0004792
TRINITY_DN198914_c0_g3	Up	protein fucoxanthin	GO:0031409		yes
